# Supplementary material for: Nontoxic amphiphilic carbon dots as promising drug nanocarriers across the blood–brain barrier and inhibitors of β-amyloid
Source: Royal Society of Chemistry journal article supplement (doi:10.1039/c9nr08194a), 2019-01-01
Supplement: c9nr08194a1.pdf [file c9nr08194a1.pdf]

## Nontoxic Amphiphilic Carbon Dots as Promising Drug Nanocarriers across the Blood-Brain Barrier and Inhibitors of $\beta$ -Amyloid

Yiqun Zhou,<sup>1</sup> Piumi Y. Liyanage,<sup>1</sup> Dinesh Devadoss,<sup>2</sup> Linda Rebeca Rios Guevara,<sup>1</sup> Ling Cheng,<sup>1</sup> Regina M. Graham,<sup>3</sup> Hitendra S. Chand,<sup>2</sup> Abdulrahman O. Al-Youbi,<sup>4</sup> Abdulaziz S. Bashammakh,<sup>4</sup> Mohammad S. El-Shahawi,<sup>4</sup> Roger M. Leblanc<sup>1\*</sup>

<sup>1</sup> Department of Chemistry, University of Miami, Coral Gables, FL 33146, USA

<sup>2</sup> Department of Immunology and Nano-Medicine, Florida International University, Miami, FL 33199, USA

<sup>3</sup> Department of Neurological Surgery, Miller School of Medicine, University of Miami, Miami, Florida 33136, USA

<sup>4</sup> Department of Chemistry, King Abdulaziz University, P.O. Box 80200, Jeddah 21589, Kingdom of Saudi Arabia

**Fig. S1.** Confocal images of Y-CDs aqueous dispersion (0.1 mg/mL) permeated into the blood (a, b) and CNS: spinal cord (c, d) and brain (e, f) of zebrafish. (a, c, e are merged images of bright field and under the excitation of 405 nm; b, d, f are images under the excitation of 405 nm only). The figure is adapted with the permission from the publisher.<sup>1</sup>

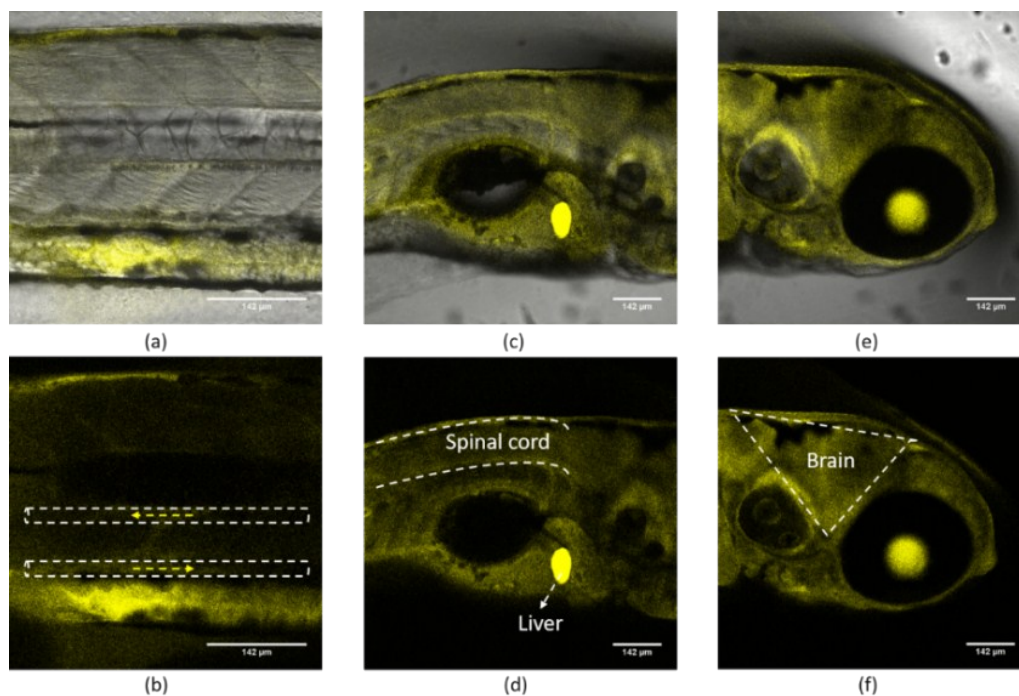

**Fig. S2.** Confocal images of zebrafish soaked in different carbon dots solutions (0.1 mg/mL). (left-right: control (a), carbon dots from carbon nanopowder (b), and from BSA (c)).

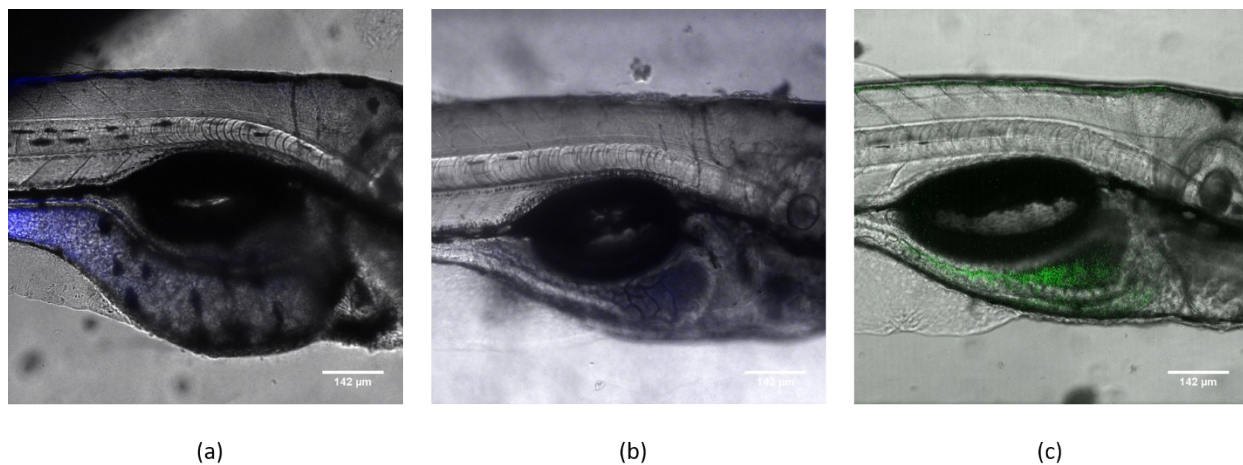

**Fig. S3.** TEM images of other two CDs aqueous dispersions (0.1 mg/mL). (a) CDs prepared from carbon nanopowder; (b) CDs prepared from BSA.

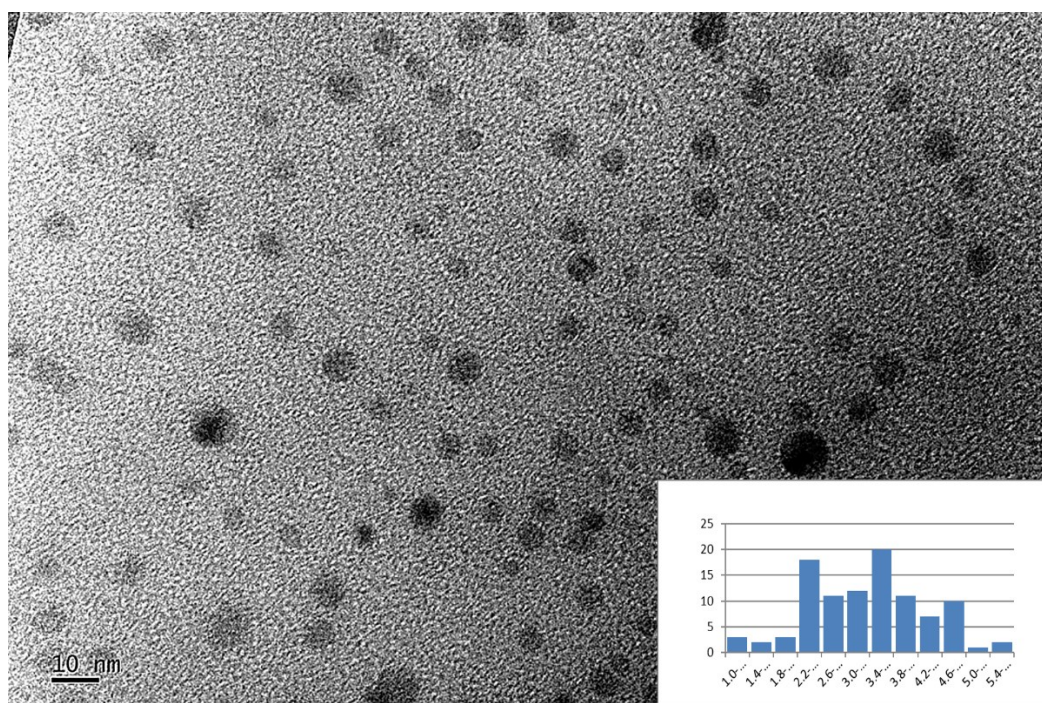

(a)

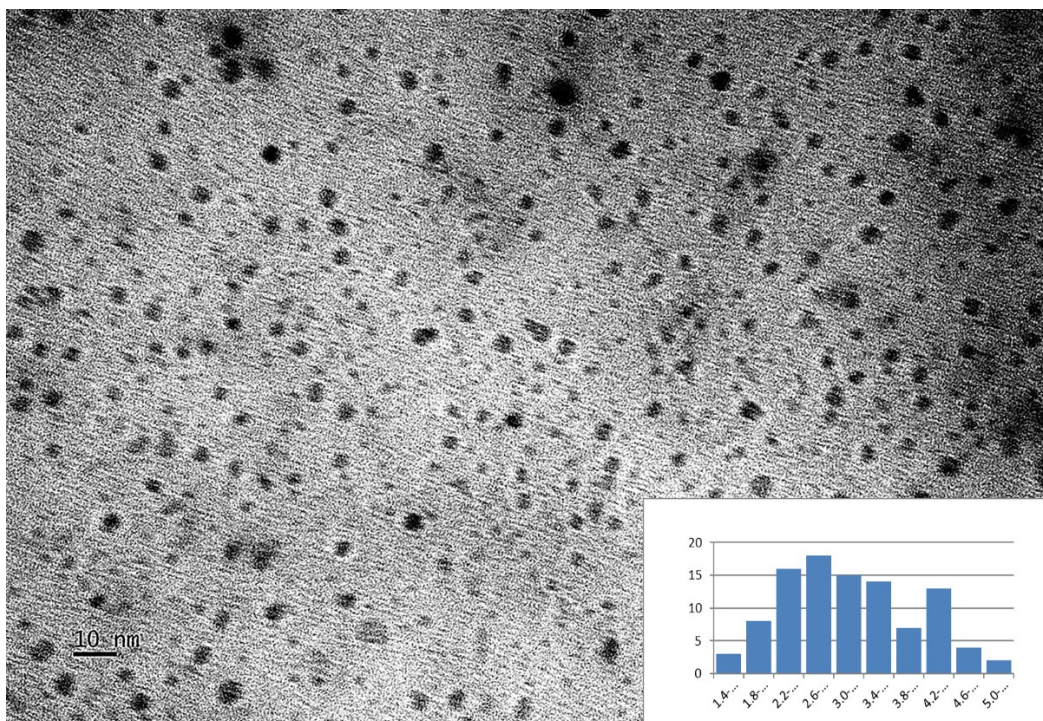

(b)

**Fig. S4.** The fluorescence emission spectra of Y-CDs coated with 3-amino-1-propanol (a) or DEA (c) measured with a 1 cm quartz cuvette; FTIR spectra of Y-CDs coated with 3-amino-1-propanol (b) or DEA (d) with air as the background.

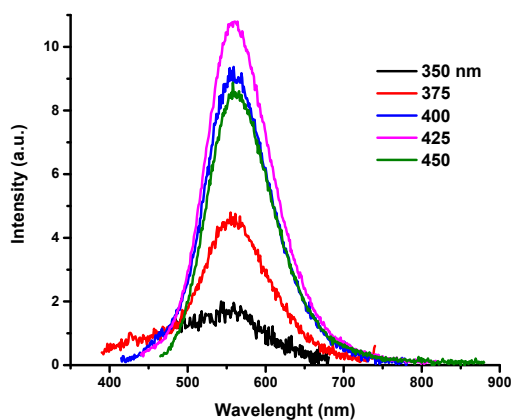

(a)

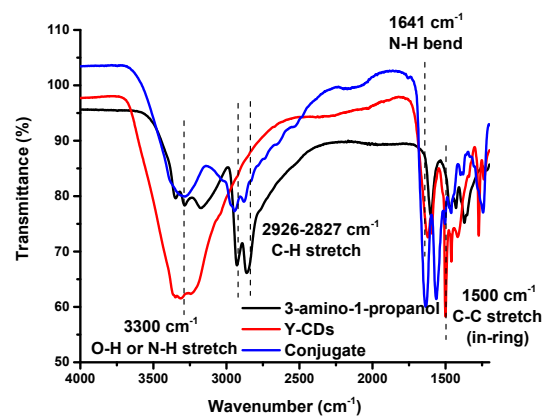

(b)

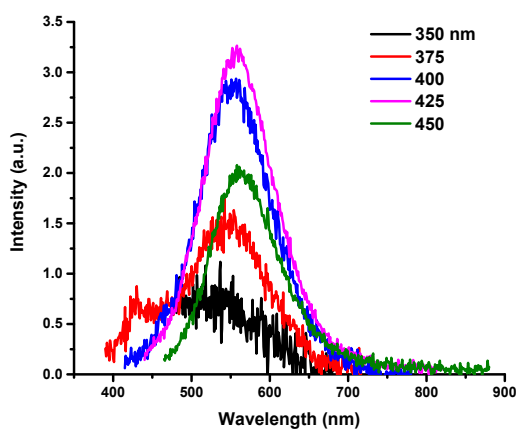

(c)

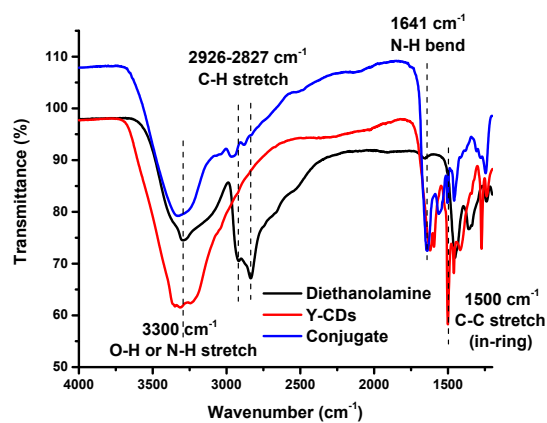

(d)

**Table 1.** Zeta potential values of all the three CDs aqueous dispersions (0.1 mg/mL).

|                            | Black CDs | Y-CDs | BSA CDs |
|----------------------------|-----------|-------|---------|
| <b>Zeta potential (mV)</b> | -13.9     | -15.3 | -12.7   |

**Table 2.** Particle sizes of all the three types of CDs.

|                     | Black CDs | Y-CDs | BSA CDs |
|---------------------|-----------|-------|---------|
| <b>Mean (nm)</b>    | 3.34      | 3.416 | 3.227   |
| <b>STDEV</b>        | 0.988     | 0.985 | 0.937   |
| <b>Minimum (nm)</b> | 1.154     | 1.351 | 1.538   |
| <b>Maximum (nm)</b> | 6.401     | 5.731 | 6.866   |

## References

1. Y. Zhou, K. J. Mintz, S. K. Sharma and R. M. Leblanc, *Langmuir*, 2019, **35**, 9115-9132.
